# Supplementary material for: The Metabolism of a Novel Cytochrome P450 (CYP77B34) in Tribenuron-Methyl-Resistant Descurainia sophia L. to Herbicides with Different Mode of Actions
Source: Int J Mol Sci. 2022 May 22;23(10):5812. doi: 10.3390/ijms23105812 (PMC9147942; doi:10.3390/ijms23105812)
Supplement: Supplementary file 1 [file ijms-23-05812-s001.zip › ijms-1741661-supplementary.pdf]

# The Metabolism of a Novel Cytochrome P450 (CYP77B34) in Tribenuron-Methyl-Resistant *Descurainia sophia* L. to Herbicides with Different Mode of Actions

Jing Shen, Qian Yang, Lubo Hao, Lingling Zhang, Xuefeng Li and Mingqi Zheng \*

Department of Applied Chemistry, College of Science, China Agricultural University, Beijing 100193, China; [shenjingtust@cau.edu.cn](mailto:shenjingtust@cau.edu.cn) (J.S.); [yangq1991@163.com](mailto:yangq1991@163.com) (Q.Y.); [13156971873@163.com](mailto:13156971873@163.com) (L.H.); [zhangll@cau.edu.cn](mailto:zhangll@cau.edu.cn) (L.Z.); [lixuefeng2007@163.com](mailto:lixuefeng2007@163.com) (X.L.)

\* Correspondence: [mqzheng@cau.edu.cn](mailto:mqzheng@cau.edu.cn)

## Figure content:

**Figure S1.** Nucleotide and amino acid sequence of CYP77B34 from *Descurainia sophia* L.

**Figure S2.** Multiple sequence alignment of nucleotide sequences of CYP77B34 with their respective homologs using DNAMAN software.

**Figure S3.** Phylogenetic analysis of nucleotide sequences of CYP77B34 was inferred using the Neighbour-joining method employing MEGA7 software.

**Figure S4.** Pearson correlation coefficient between pCAMBIA1302-GFP and mCherry-HDEL or CYP77B34-GFP and mCherry-HDEL at *N. benthamiana* leaves.

**Figure S5.** Transcript levels of CYP77B34 in transgenic *Arabidopsis*.

**Figure S6.** Dose-response curves of transgenic *Arabidopsis* expressed CYP77B34 to tribenuron-methyl, carfentrazone-ethyl and oxyfluorfen, compared to the GFP control.

**Figure S7.** Susceptibility of *Arabidopsis* transformed with or without *D. sophia* CYP77B34 to tribenuron-methyl, carfentrazone-ethyl, oxyfluorfen, bromoxynil and pretilachlor with different concentrations.

**Figure S8.** Sensitivities of transgenic *Arabidopsis* transformed with or without *D. sophia* CYP77B34 to glyphosate, glufosinate ammonium, diclofop-methyl, imazamox, propyzamide, fluroxypyr, fomesafen, atrazine, flumetsulam, pendimethalin and napropamide with different concentrations.

**Figure S9.** Mass spectrogram of quantitative (A) and qualitative (B) ion in tribenuron-methyl.

**Figure S10.** Standard curve of tribenuron-methyl in elution matrix (A) and extract

matrix (B).

**Table content:**

**Table S1.** The recoveries of different addition levels of tribenuron-methyl in two matrixes.

**Table S2.** Tribenuron-methyl metabolized by different transgenic *Arabidopsis* plants at different time points.

```

1   ATGGATCTTACGACGTTATCATATTCTTGTGGCTCTCTACTTCATCAACCTATGGTGGCGCGGTACTCTCCGCGGGAAGCAGCCAGTGTGGCTGAACATTCCACGGGACCAAAA
1   M D L T D V I I F L F A L Y F I N L W W R R Y S S A G S S Q C R L N I P P G P K

121  GGATGGCCACTGTAGGTAACTTCAAGTCATATTCCAAGTCGCCATTTTGTCTTCATAATGCGTGATCTACGTAAGAAGTTGGTCCAATATTCACCATGCAATGGGACAACGT
41   G W P L V G N L L Q V I F Q R R H F V F I M R D L R K K F G P I F T M Q M G Q R

241  ACAATGATTATGTCACGACGAAAAAATCATCCAGGCGCTAGTTCAACGTGGGCCCACTTTCGCTTCCGCGCCCGGACTCCCGATCCGACTCATGTTTAGCGTTGAAAAATGC
81   T M I I V T D E K L I H E A L V Q R G P T F A S R P P D S P I R L M F S V G K C

361  GCTATAAATCGCGGAGTACGATCTTTATGGCGAACTTAAGGAGGAAGTTCGTGACGAGCTAGTGACCGCTACAAGAGTGAAGCAGTGTCTCGGATACGACTTGGGCTATGGAT
121  A I N S A E Y G S L W R T L R R N F V T E L V T A T R V K Q C S W I R T W A M D
                        Helix C

481  AATCATATGAAGAGGATTAAGGAGAAATTTGAGAAAGTTTCGTGCGAGGTATGAATCAATGCAGGTAAACGATCTGTAGCATCTTGATCTGTCTTGTTCGGCGCAAGATCAGC
161  N H M K R I K T E N I E K G F V E V M N Q C R L T I C S I L I C L C F G A K I S

601  GAGGGAAGATTAAGAACATAGAGAATGTTCTTAAGACGTTATGTCTATAACTTCCCGACGTTACCGGACTTTTTCGGGTATTCACTCCATTTGTTTCGGCGTCAAGTACGAGAAGCG
201  E G K I K N I E N V L K D V M L I T S P T L P D F L P V F T P L F R R Q V R E A

721  AGAGAGCTGAGGAAAACGCACTCGAATGCTTGTTCGGTTGATAAGAAACCGACGTAAGTTTCGTGATGCAAGGCGAGTCTAACGACGAGATGGTGAATCCGATTGGTGGCGCTTAT
241  R E L R K T Q L E C L V P L I R N R R K F V D A K A S P N D E M V S P I G A A Y

841  GTGATTCTTTGTTAATTTGAACCTGATCGAGAGAGCGGTGAGCTTGGAGAGCAAGAGATTGTGACTTTGTGTCGGAATGTCTCGGCCGTACGGACACGAGTCAACGACGCTT
281  V D S L F N L N L I E R G G E L G D E E I V T L C S E I V S A G T D T S A T T L
                        Helix I

961  GAATGGCGCTTACTTCATCTAGTGACCGACCAAAACATTCAAGAGAAGCTATACGAGGAAGTCGTTGGAGTTGTTGGCAAAAACGCAATCGTTGAAGAGGATGACGTGGCAAAAATGCCT
321  E W A L L H L V T D Q N I Q E K L Y E E V V G V V G K N G I V E E D V A K M P

1081 TATTTGGAGGCTATTGTGAAAGAGACTCTCCGCGACATCCTCCGGGACATTTCCTTCTCTCAGCGTCCGCTGAAAGATACGGAGCTAGGAGGGTACGATATCCGCGAGGGGCATAT
361  Y L E A I V K E T L R R H P P G H F L L S H A A V K D T E L G G Y D I P A G A Y
                        Helix K

1201 GTGGAAATTTACACAGCTTGGGTTACTGAGAACCCGGAGATTTCGTGGATCCGGGTAAGTTTCGACCGAGAGGTTTAAACCGGTGGGGACGGTGTGATGCTGATTGGACCGGGACA
401  V E F Y T A W V T E N P E I W S D P G K F R P E R F L T G G D G V D A D W T G T
                        Meander domain

1321 CGTGGCGTTACAATGTTGCCTTTTGGTGGGGTCGTAGGATCTGTCCGGCTTGGTCTTTGGGGATTCTACACATCAACTTGATGCTTGCTAGAATGATACATTGGTTAAGTGGATCCCG
441  R G V T M L P F G A G R R I C P A W S L G I L H I N L M L A R M I H S F K W I P
                        Heme binding domain

1441 GTTCGGATTCTCCACCGACCGACTGAGACTTACGCATTACGGTTCGTGATGAAAAATTCCTCAAAGCCAGATCCTGTCAAGGACTTGA
481  V P D S P P D P T E T Y A F T V V M K N S L K A Q I L S R T *

```

**Figure S1.** Nucleotide and amino acid sequence of CYP77B34 from *D. sophia*. The CYP77B34 gene contains a 1530-bp ORF encoding 510 amino acids. The underlined amino acid indicates the typical P450 conserved domains (Helix C, Helix I, Helix K, Meander domain and heme binding domain).

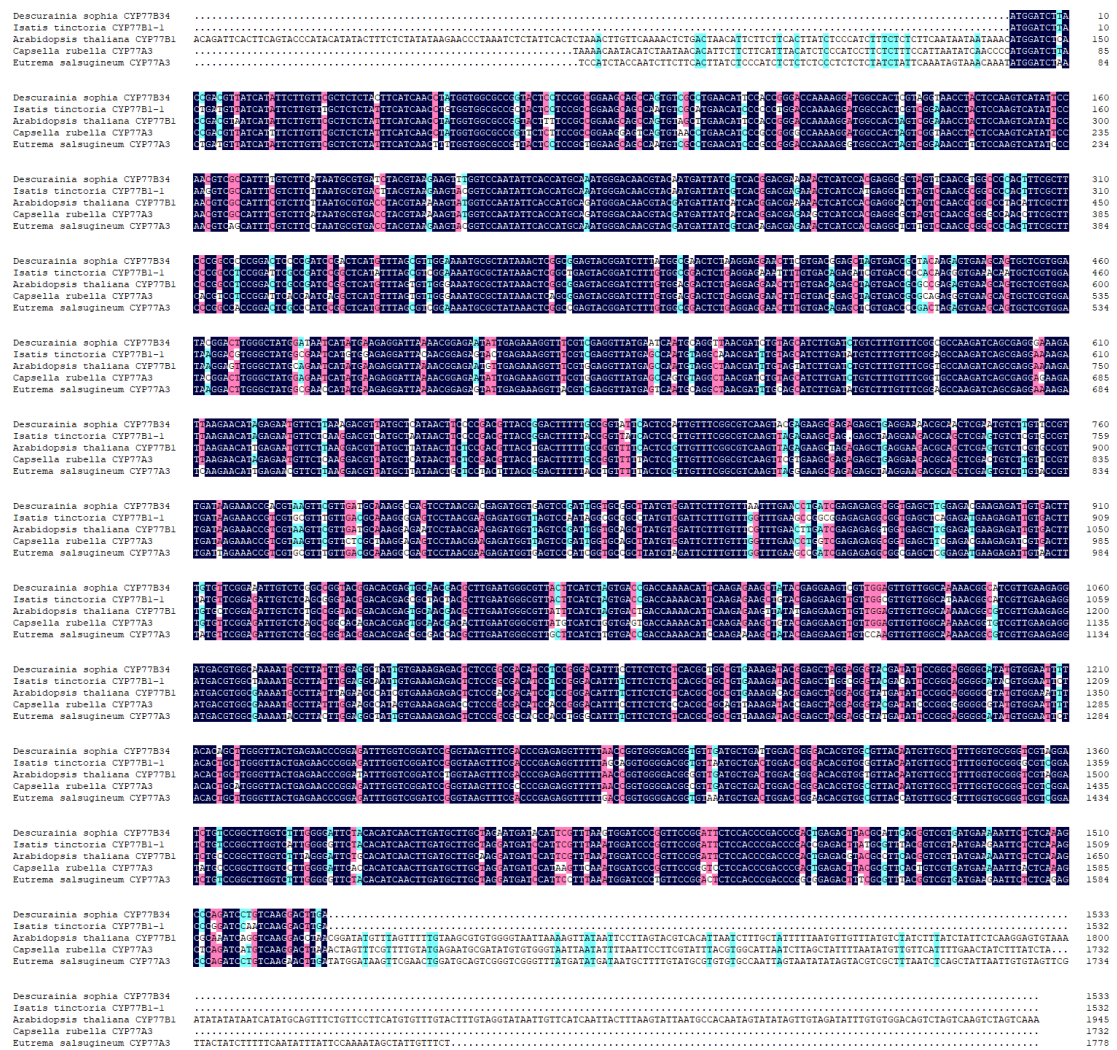

**Figure S2.** Multiple sequence alignment of nucleotide sequences of *CYP7B34* with their respective homologs using DNAMAN software. Sequences used for alignment were from *D. sophia* (CYP77B34: MF152623), *Isatis tinctoria* (CYP77B1-1: MT145859.1), *Arabidopsis thaliana* (CYP77B1: NM\_101033.4), *Capsella rubella* (CYP77A3: XM\_006307211.2) and *Eutrema sasugineum* (CYP77A3: XM\_006417272.2).

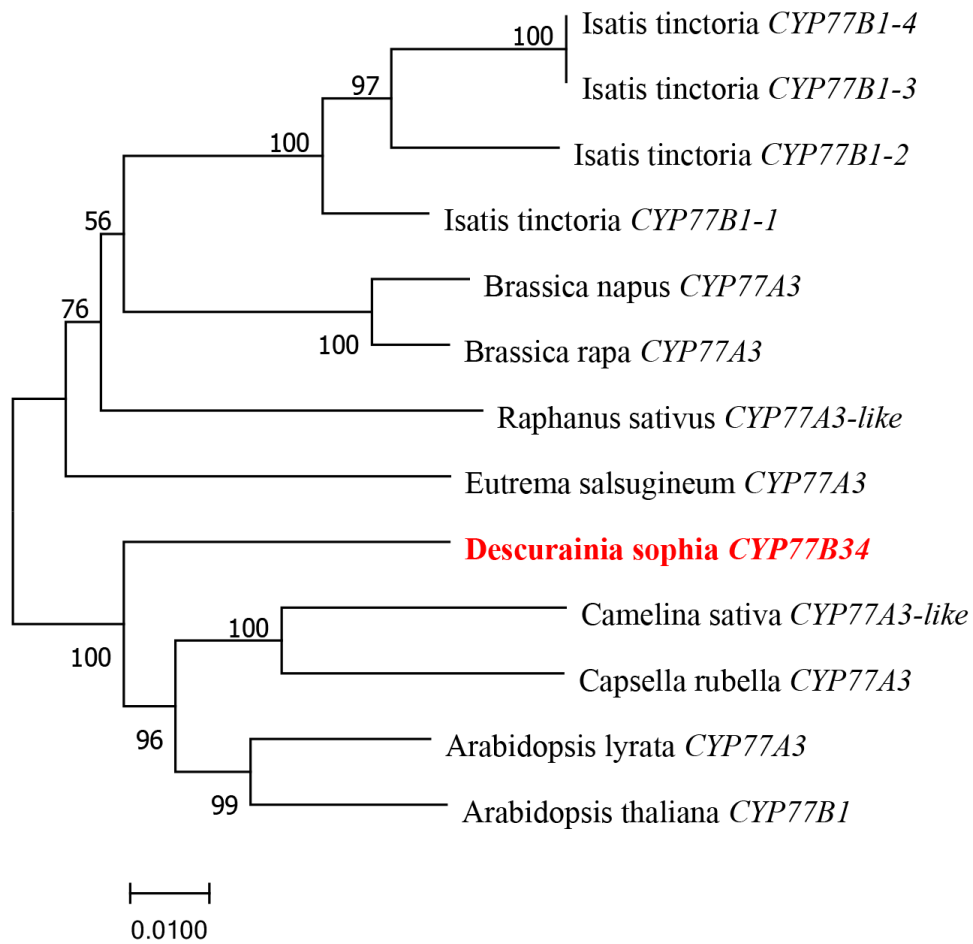

**Figure S3.** Phylogenetic analysis of nucleotide sequences of *CYP77B34* was inferred using the Neighbour-joining method employing MEGA7 software. Bootstrap analysis was performed with 1000 replicates. The number represents bootstrap values. Bar, 0.01 substitutions per site. Total 13 nucleotide sequences of *D. sophia* (MF152623), *I. tinctoria* (MT145859.1, MT145860.1, MT145881.1 and MT145882), *Brassia napus* (XM\_013853378.2), *Brassica rapa* (XM\_009119936.33), *Raphanus sativus* (XM\_018594812.1), *E. salsugineum* (XM\_006417272.2), *Cameline sativa* (XM\_010494752.2), *C. rubella* (XM\_006307211.2), *Arabidopsis lyrata* (XM\_002889834.2) and *A. thaliana* (NM\_101033.4) were used for analysis.

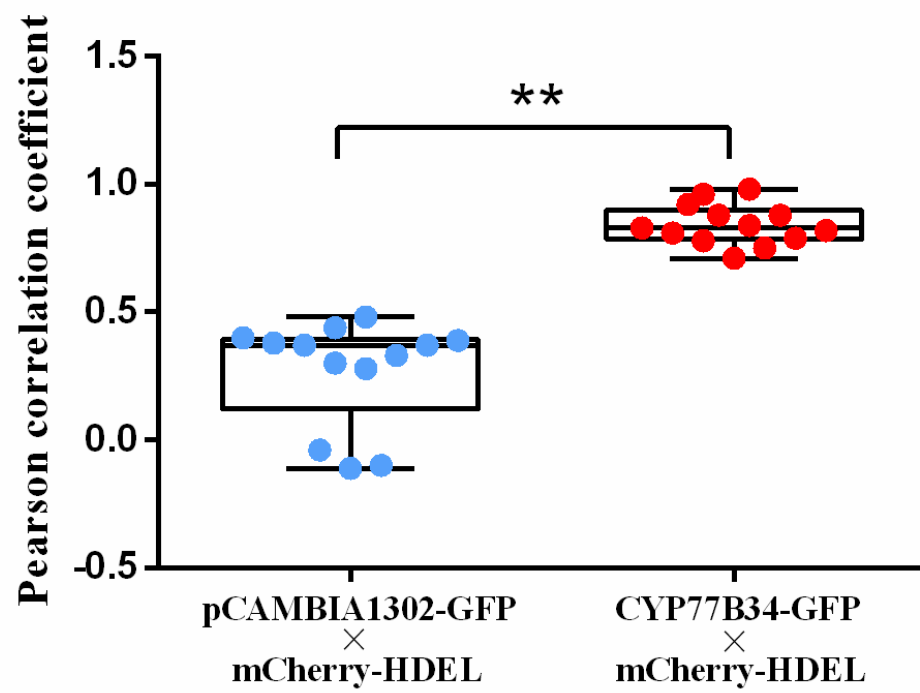

**Figure S4.** Pearson's correlation coefficient between pCAMBIA1302-GFP and mCherry-HDEL or CYP77B34-GFP and mCherry-HDEL at *N. benthamiana* leaves.  $n > 10$ . Values shown are means  $\pm$  SE. Significant differences were determined via one-way ANOVA with multiple comparisons. (\*\* $p \leq 0.01$ )

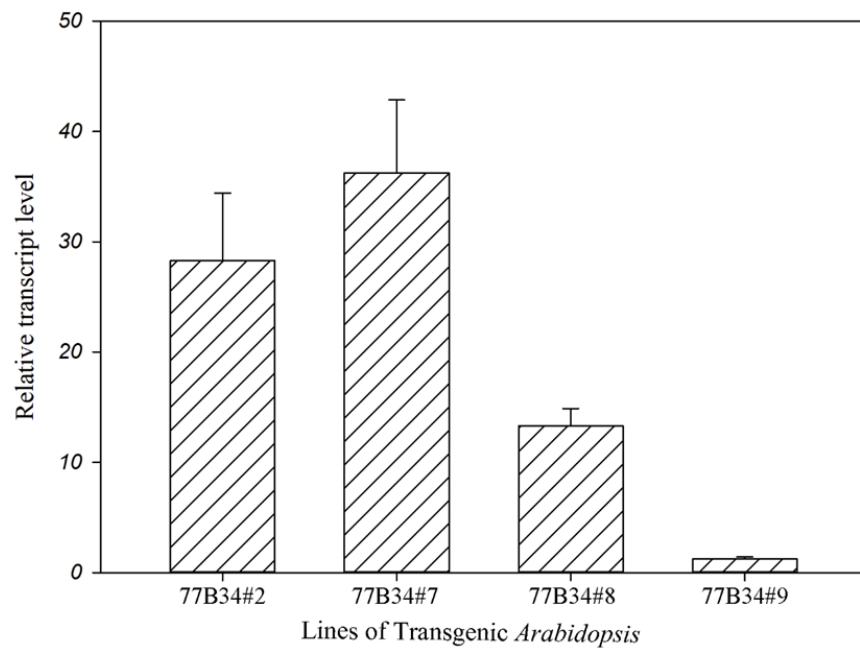

**Figure S5.** Transcript levels of *CYP77B34* in transgenic *Arabidopsis*. The expression levels of mRNA in different lines of transgenic *Arabidopsis* (77B34#2, 77B34#7, 77B34#8 and 77B34#9). GAPDH was the reference gene. Data was expressed as values relative to 77B34#9. The bars indicate the standard deviation.

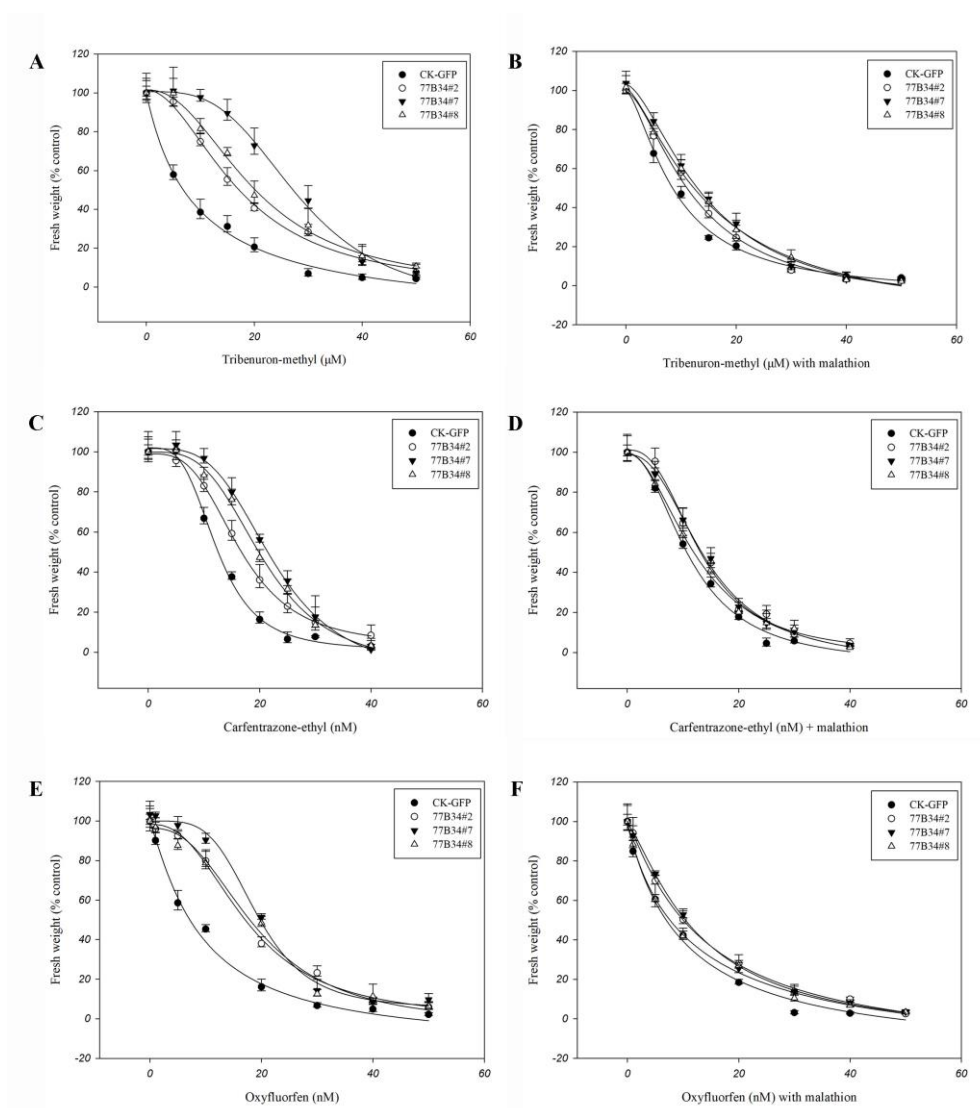

**Figure S6.** Dose-response curves of transgenic Arabidopsis expressed CYP77B34 (77B34#2, 77B34#7 and 77B34#8) to tribenuron-methyl (A and B), carfentrazone-ethyl (C and D) and oxyfluorfen (E and F), compared to the GFP control (CK-GFP). A, C and E were treated with herbicides; B, D and E were treated with herbicides and P450 inhibitor malathion (55 μM). Each data point is the mean  $\pm$  SE of four replicates.

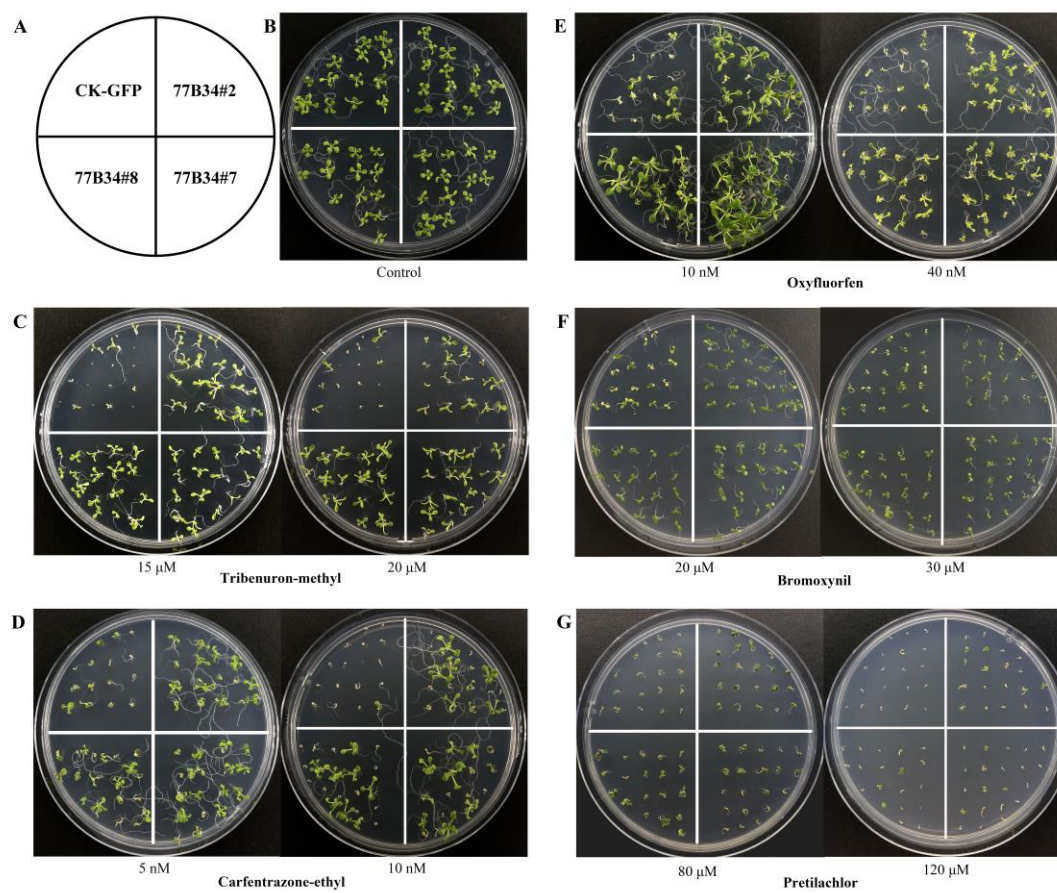

**Figure S7.** Susceptibility of *Arabidopsis* transformed with or without *D. sophia* CYP77B34 to tribenuron-methyl (C), carfentrazone-ethyl (D), oxyfluorfen (E), bromoxynil (F) and pretilachlor (G) with different concentrations. A: Distribution diagram of *Arabidopsis* carrying GFP or CYP77B34-GFP for all Petri dish. B: Transgenic *Arabidopsis* grows in medium without herbicide. Seedlings grown for 10 d on Murashige and Skoog (MS) medium. CK-GFP: transgenic *Arabidopsis* expressing empty plasmid; 77B34#2, 77B34#7 and 77B34#8: different lines of transgenic *Arabidopsis* expressing CYP77B34.

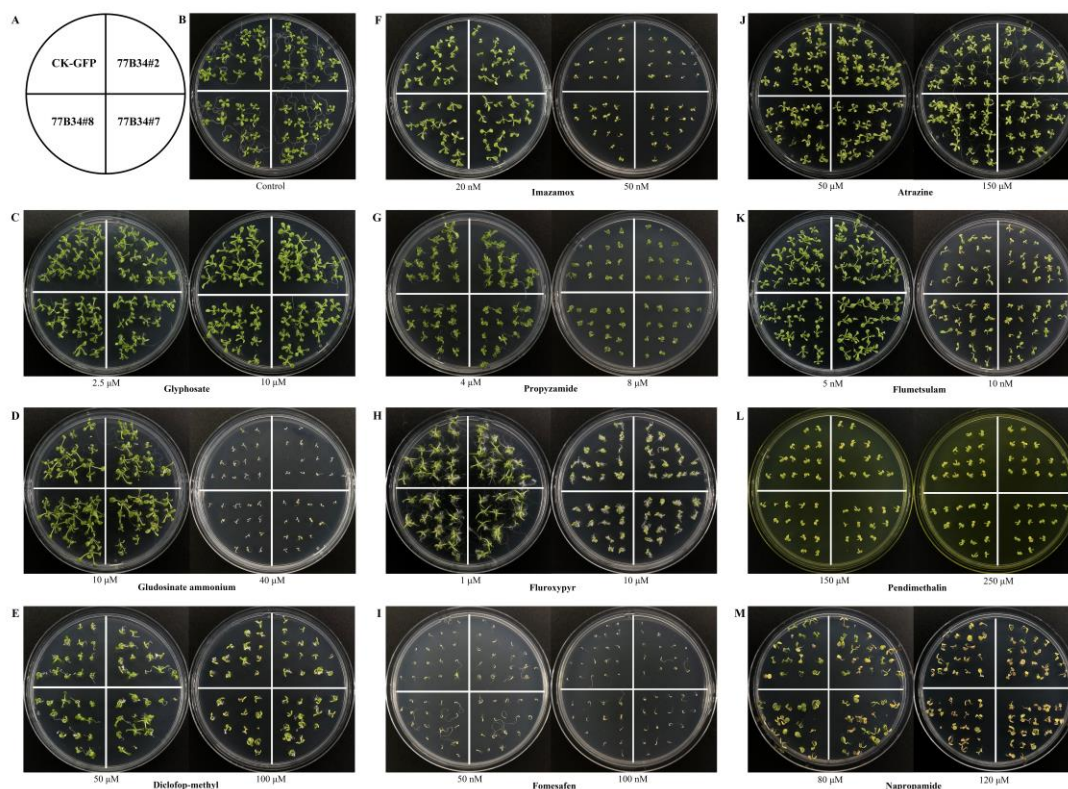

**Figure S8.** Sensitivities of transgenic *Arabidopsis* transformed with or without *D. sophia* *CYP77B34* to glyphosate (C), glufosinate ammonium (D), diclofop-methyl (E), imazamox (F), propyzamide (G), fluroxypyr (H), fomesafen (I), atrazine (J), flumetsulam (K), pendimethalin (L) and napropamide (M) with different concentrations. A: Distribution diagram of *Arabidopsis* carrying GFP or *CYP77B34*-GFP for all Petri dish. B: Transgenic *Arabidopsis* grows in medium without herbicide. Seedlings grown for 10 d on MS medium. CK-GFP: transgenic *Arabidopsis* expressing empty plasmid; 77B34#2, 77B34#7 and 77B34#8: different lines of transgenic *Arabidopsis* expressing *CYP77B34*.

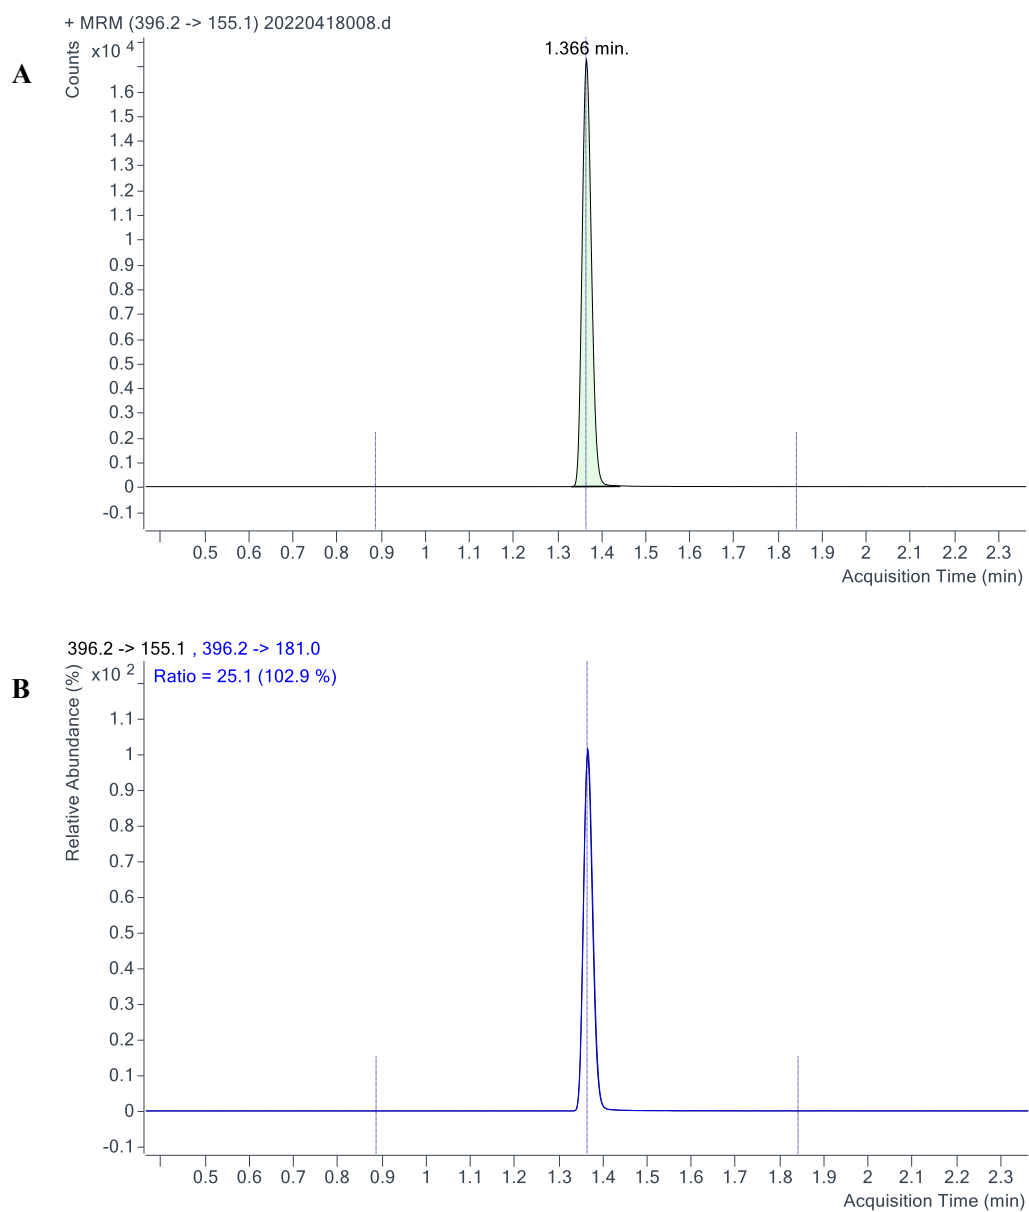

**Figure S9.** Mass spectrogram of quantitative (A) and qualitative (B) ion in tribenuron-methyl.

**A**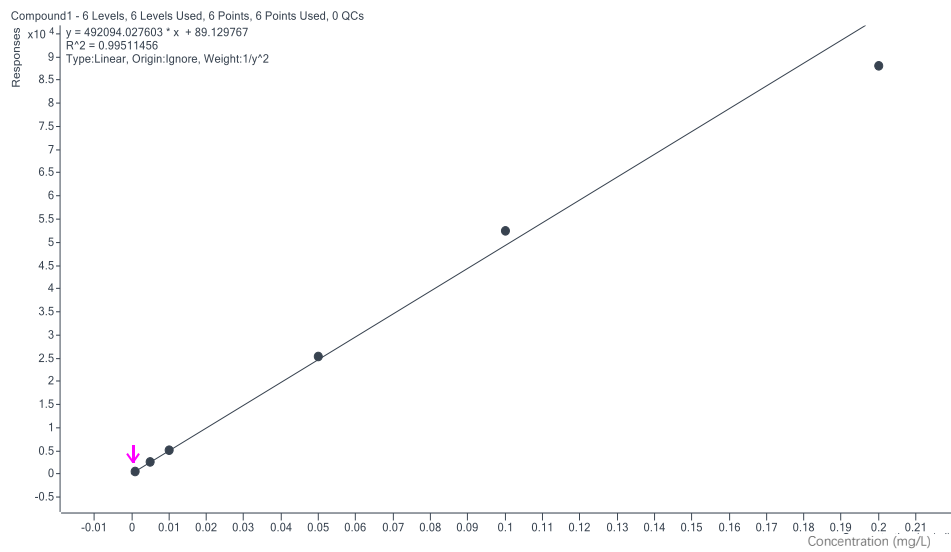**B**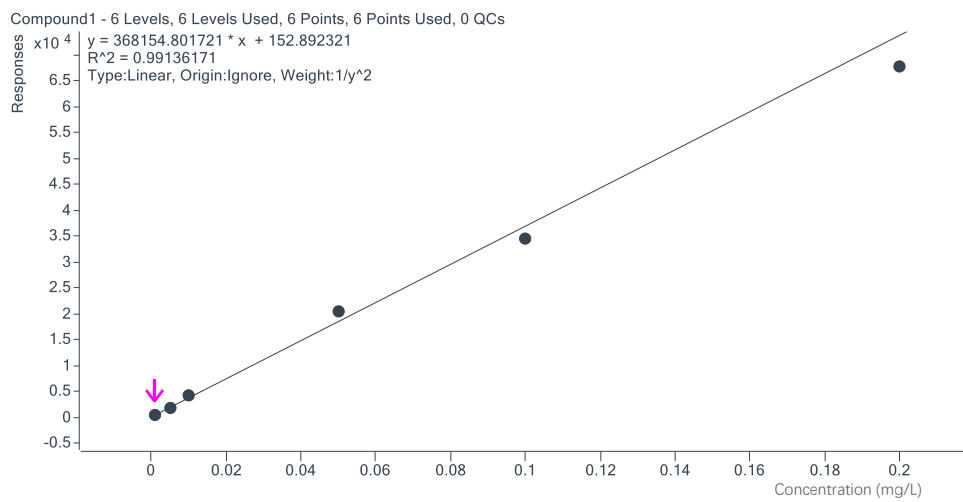

**Figure S10.** Standard curve of tribenuron-methyl in elution matrix (A) and extract matrix (B).

**Table S1.** The recoveries of different addition levels of tribenuron-methyl in two matrixes

| Elution matrix            |              |         | Extract matrix            |              |         |
|---------------------------|--------------|---------|---------------------------|--------------|---------|
| Addition levels<br>(mg/L) | Recovery (%) | RSD (%) | Addition levels<br>(mg/L) | Recovery (%) | RSD (%) |
| 0.01                      | 102.27       | 1.15    | 0.016                     | 90.38        | 3.14    |
| 0.10                      | 105.19       | 1.16    | 0.16                      | 91.80        | 0.28    |
| 0.20                      | 90.93        | 0.70    | 0.32                      | 82.36        | 2.93    |

**Table S2.** Tribenuron-methyl metabolized by different transgenic *Arabidopsis* plants at different time points

| Days after<br>treatment | Tribenuron-methyl metabolism (% of absorption) <sup>a</sup> |             |             |              |
|-------------------------|-------------------------------------------------------------|-------------|-------------|--------------|
|                         | CK-GFP                                                      | 77B34#2     | 77B34#7     | 77B34#8      |
| 1                       | 47.64±4.70a                                                 | 56.38±3.25b | 59.58±2.43b | 57.16±3.01b  |
| 3                       | 68.96±4.00a                                                 | 82.13±0.43b | 85.05±0.49b | 83.33±1.07b  |
| 5                       | 72.51±3.69a                                                 | 86.37±1.10b | 88.77±0.84b | 87.06±0.28b  |
| 7                       | 78.71±1.38a                                                 | 87.57±0.88b | 89.88±1.09c | 89.05±0.15bc |

<sup>a</sup> Rows with different letters indicate tribenuron-methyl metabolism are significant different (from SPSS analysis).  
Each data is mean ± SE of four replicates.
